# Supplementary material
Source: PubMed Central journal article supplement (PMC9048881)
Supplement: koac062_supplementary_data.pdf [file koac062_supplementary_data.pdf]

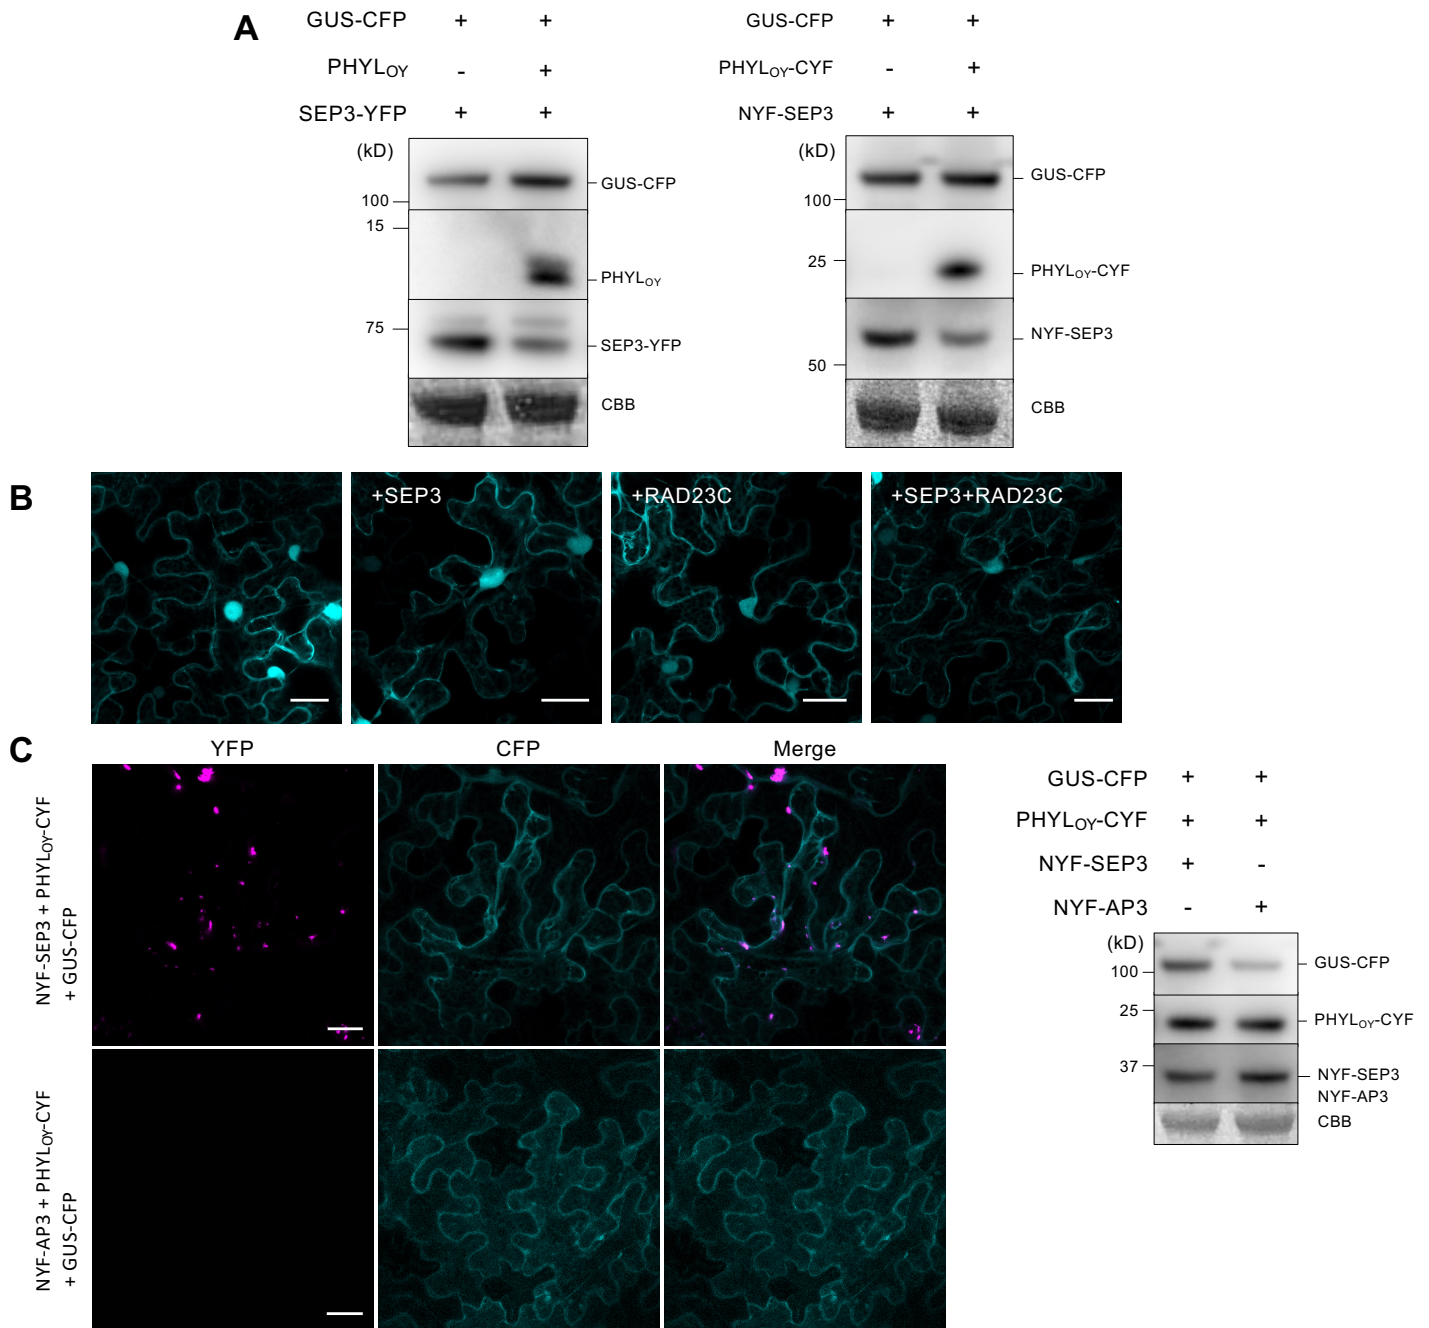

**Supplemental Figure 1.** Supporting information for fluorescent microscopy analysis. (Supports Figure 1.)

**(A)** Confirmation of moderate SEP3 degradation by PHYL<sub>OY</sub> and PHYL<sub>OY</sub>-CYF. the expression of PHYL<sub>OY</sub>, SEP3, GUS-CFP, and P19 were mixed at a ratio of 2:4:3:1 and infiltrated into *N. benthamiana* leaves.

**(B)** Localization of PHYL<sub>OY</sub>-CFP in *Nicotiana benthamiana* epidermal cells. *Agrobacterium* cultures (OD<sub>600</sub> = 1.0) for the expression of PHYL<sub>OY</sub>-CFP, SEP3, RAD23C, and P19 were mixed at a ratio of 2:4:3:1 and infiltrated into *N. benthamiana* leaves.

**(C)** BiFC analysis using NYF-SEP3 or NYF-AP3, PHYL<sub>OY</sub>-CYF, and GUS-CFP. Proteins were expressed as in the case of Figure 1D. Proteins were detected 40 h after infiltration by immunoblot analysis, using a polyclonal anti-GFP or an anti-PHYL<sub>OY</sub> antibodies. Coomassie Brilliant Blue (CBB) staining is shown as a loading control. Fluorescence was observed 40 h after infiltration. Bars indicate 25 μm.

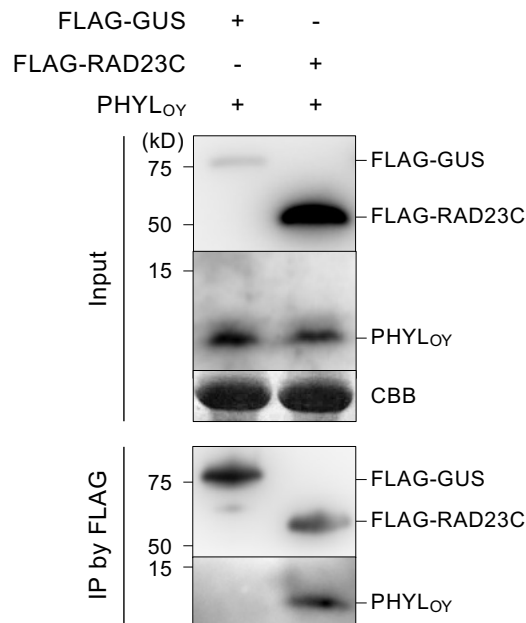

**Supplemental Figure 2.** In planta coimmunoprecipitation assay using FLAG-RAD23C and PHYL<sub>OY</sub>. (Supports Figure 2.)

*Agrobacterium* cultures for expression of FLAG-fused proteins ( $OD_{600} = 0.5$ ), PHYL<sub>OY</sub> ( $OD_{600} = 0.1$ ), and P19 ( $OD_{600} = 1.0$ ) were mixed at a ratio of 10:10:1 and infiltrated into *N. benthamiana* leaves. FLAG-GUS was used as a control. The input and immunoprecipitated (IP) proteins (using an anti-FLAG antibody) were detected 36 h after infiltration by immunoblot analysis, using an anti-FLAG or an anti-PHYL<sub>OY</sub> antibody. Coomassie Brilliant Blue (CBB) staining is shown as a loading control.

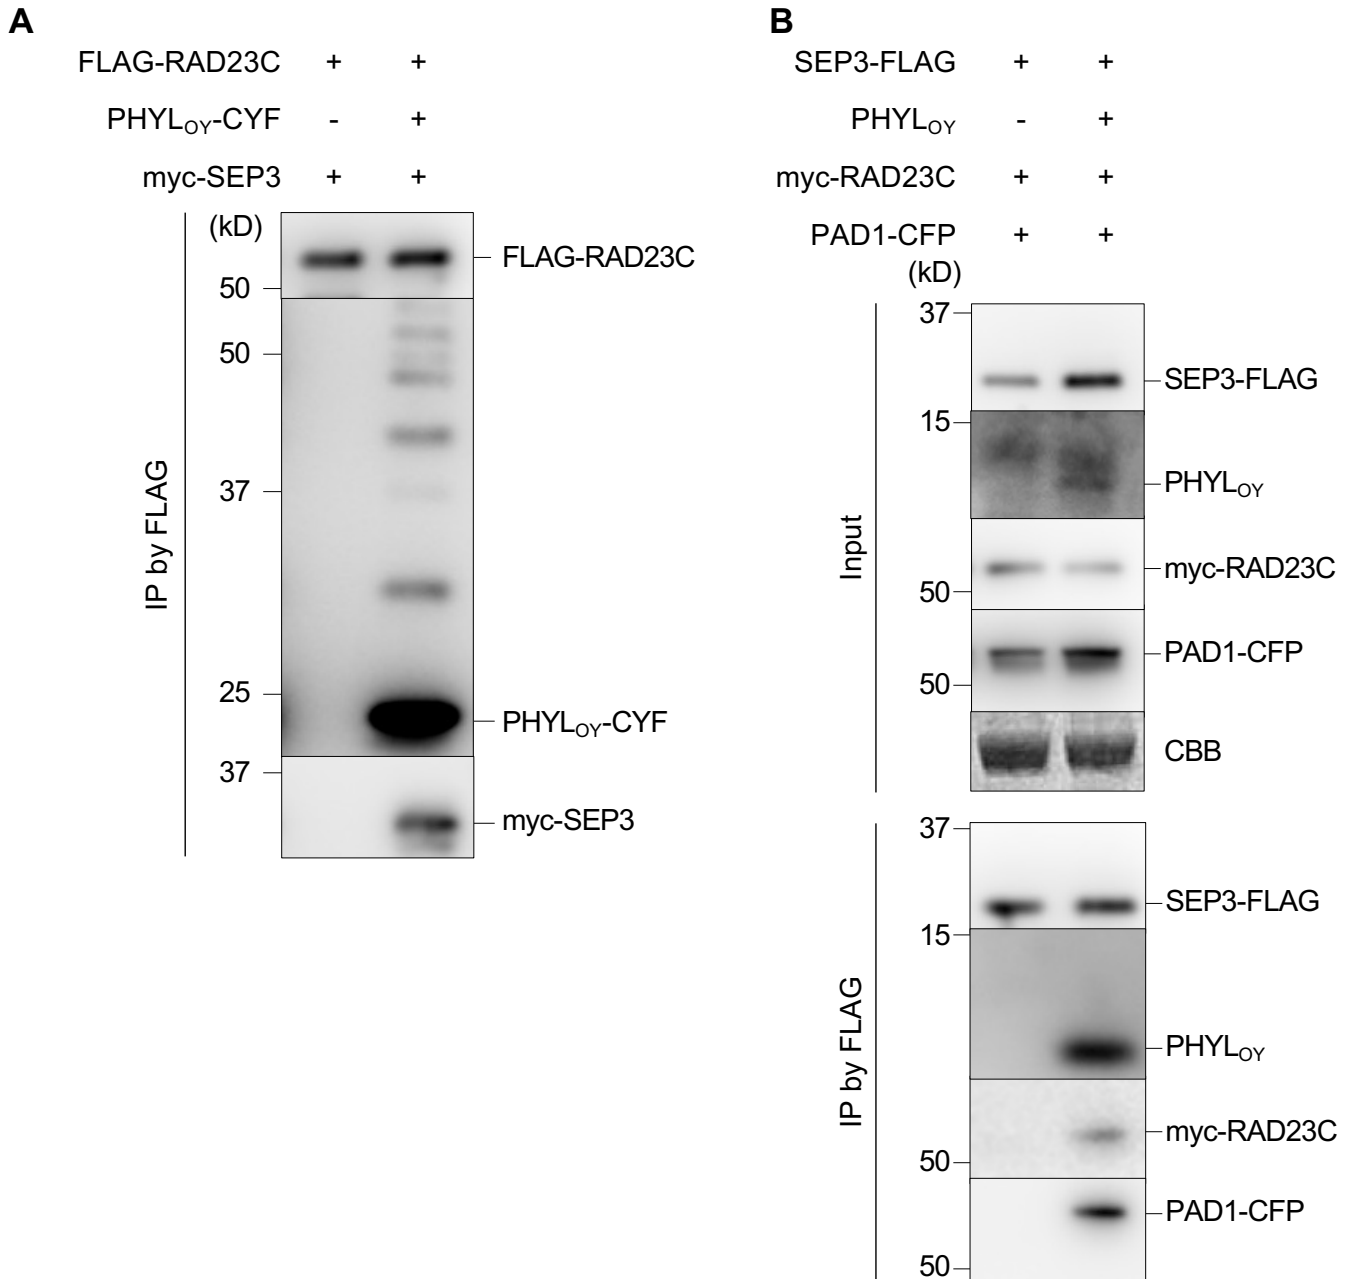

**Supplemental Figure 3.** In planta coimmunoprecipitation using (A) FLAG-RAD23C, PHYL<sub>OY</sub>-CYF, and myc-SEP3 or (B) SEP3-FLAG, PHYL<sub>OY</sub>, myc-RAD23C, and PAD1-CFP. (Supports Figure 2.)

**(A)** Protein expression, immunoprecipitation using an anti-FLAG antibody, and protein detection (immunoprecipitated proteins only) were performed as described in Figure 2A.

**(B)** *Agrobacterium* cultures for expression of SEP3-FLAG ( $OD_{600} = 1.0$ ), PHYL<sub>OY</sub> ( $OD_{600} = 0.1$ ), myc-RAD23C ( $OD_{600} = 1.0$ ), PAD1-CFP ( $OD_{600} = 1.0$ ), and P19 ( $OD_{600} = 1.0$ ) were mixed at a ratio of 1:1:1:1:0.1 and infiltrated into *N. benthamiana* leaves. Immunoprecipitation using an anti-FLAG antibody, and protein detection were performed as in (A).

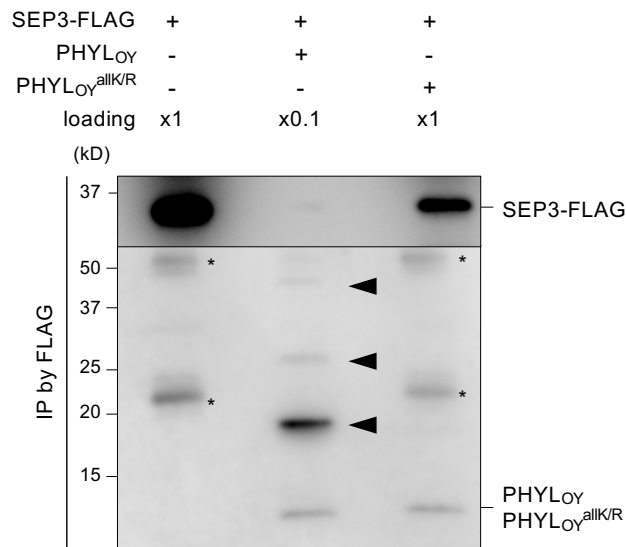

**Supplemental Figure 4.** Comparison of ubiquitination between PHYLO<sub>Y</sub> and PHYLO<sub>Y</sub><sup>allK/R</sup>. (Supports Figure 3.)

Immunoprecipitation using SEP3-FLAG and PHYLO<sub>Y</sub> or PHYLO<sub>Y</sub><sup>allK/R</sup> was performed as in Figure 3A. SEP3-interacting PHYLO<sub>Y</sub> or PHYLO<sub>Y</sub><sup>allK/R</sup> was detected by immunoblot analysis using an anti-PHYLO<sub>Y</sub> antibody. Because of the differences of in planta accumulation between PHYLO<sub>Y</sub> and PHYLO<sub>Y</sub><sup>allK/R</sup>, the loading amount of SEP3-interacting PHYLO<sub>Y</sub> was one-tenth of the amount of PHYLO<sub>Y</sub><sup>allK/R</sup> in the experiment. Bands corresponding to ubiquitinated PHYLO<sub>Y</sub> were detected (black arrows) but those to ubiquitinated PHYLO<sub>Y</sub><sup>allK/R</sup> were not, indicating that PHYLO<sub>Y</sub><sup>allK/R</sup> is not ubiquitinated. Asterisks indicate nonspecific bands, which were observed without PHYLO<sub>Y</sub><sup>allK/R</sup> expression.

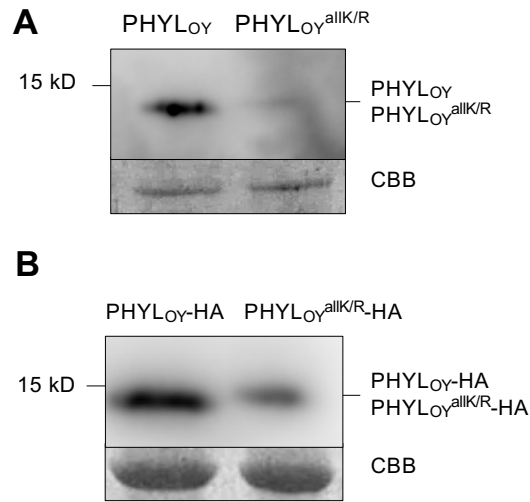

**Supplemental Figure 5.** Comparison of in planta protein accumulation between PHYLO<sub>Y</sub> and PHYLO<sub>Y</sub><sup>allK/R</sup>. (Supports Figure 3.)

**(A)** PHYLO<sub>Y</sub> and PHYLO<sub>Y</sub><sup>allK/R</sup> or **(B)** PHYLO<sub>Y</sub>-HA and PHYLO<sub>Y</sub><sup>allK/R</sup>-HA were expressed in *N. benthamiana* leaves. Protein detection was performed as described in Figure 3B using an anti-PHYLO<sub>Y</sub> (A) or an anti-HA (B) antibody.

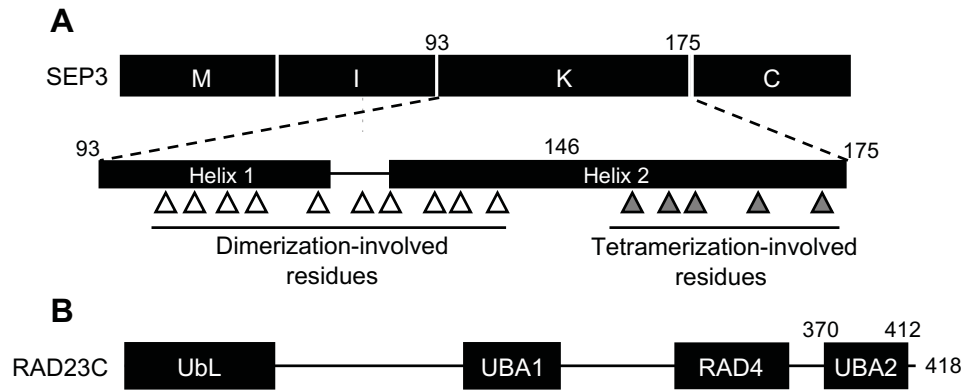

**Supplemental Figure 6.** Protein structure of SEP3 and RAD23C. (Supports Figure 4.)  
(A) The domains and residues in SEP3 involved in multimerization reported by Puranik *et al.* (2014).  
(B) Domain organization of RAD23C according to the GenBank reference sequence (AEE73826).

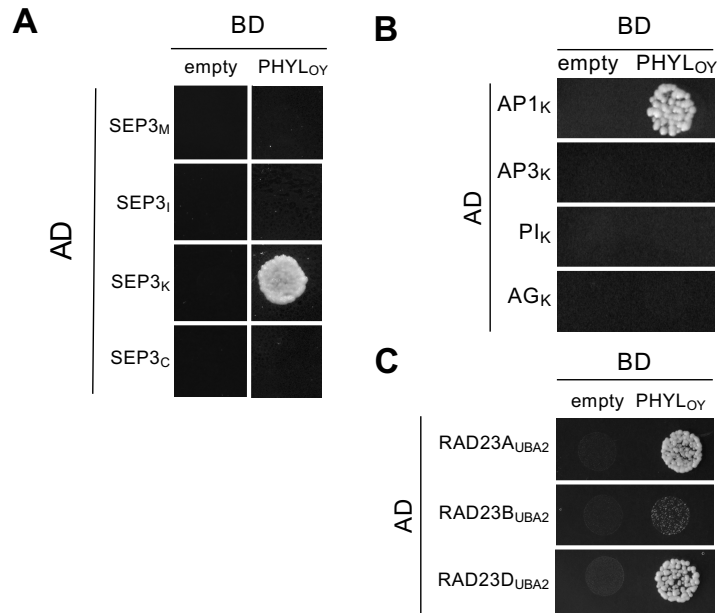

**Supplemental Figure 7.** Y2H assay using PHYLOy and domains in *A. thaliana* MTF or RAD23. (Supports Figure 4.)

**(A)** Interaction of PHYLOy with the M, I, K, and C domains of SEP3.

**(B)** Interaction of PHYLOy with the K domains of *Arabidopsis thaliana* A- (AP1), B- (AP3, PI), and C- (AG) class MTFs in yeast cells.

**(C)** Interaction of PHYLOy with the UBA2 domains of *A. thaliana*. Each Y2H assay was performed as described in Figure 4.

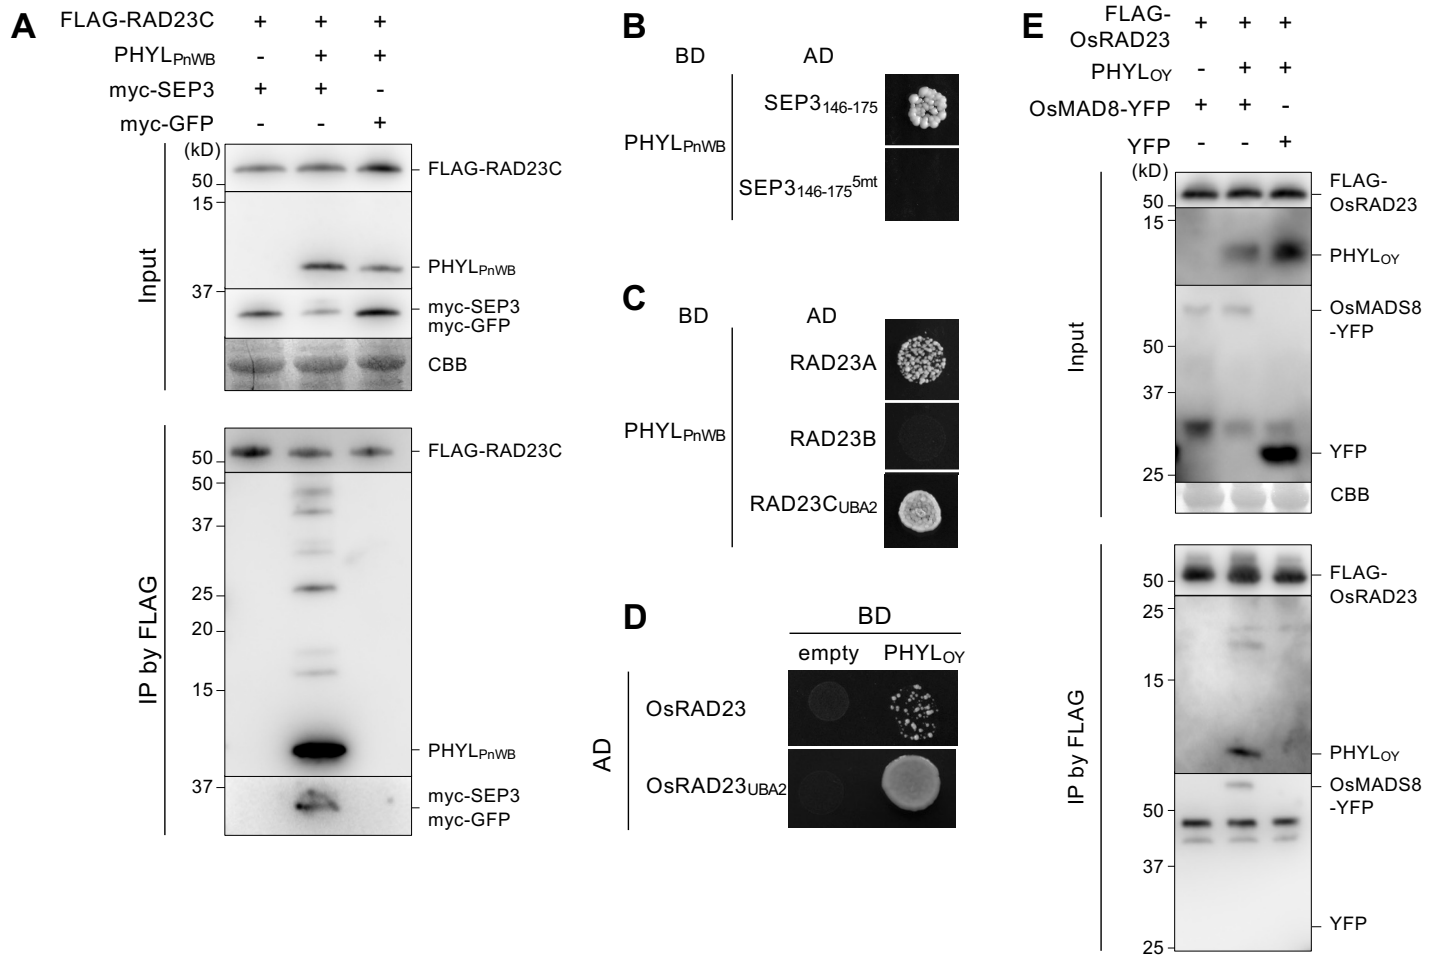

**Supplemental Figure 8.** Interactions of the MTF/phylogen/RAD23 protein complex using different phylogen or host proteins. (Supports Figure 4.)

(A) to (C) Interaction of PHYL<sub>PnWB</sub> with *Arabidopsis* proteins. (A) In planta immunoprecipitation using FLAG-RAD23C, PHYL<sub>PnWB</sub>, and myc-SEP3. (B) to (C) Y2H assay using PHYL<sub>PnWB</sub> and partial region of SEP3 (B) or *A. thaliana* RAD23 homologs (C). (D) to (E) Interaction of PHYL<sub>OY</sub> with rice proteins. (D) Y2H assay using PHYL<sub>OY</sub> and OsRAD23 or its UBA2 domain. (E) In planta immunoprecipitation using SEP3 and RAD23 homologs of rice with PHYL<sub>OY</sub>. Y2H and immunoprecipitation experiments were performed as described in Figures 4 and 2A, respectively.



Supplemental Data. Kitazawa et al. (2022). Plant Cell. A phytoplasma effector acts as a ubiquitin-like mediator between floral MADS-box proteins and proteasome shuttle proteins.

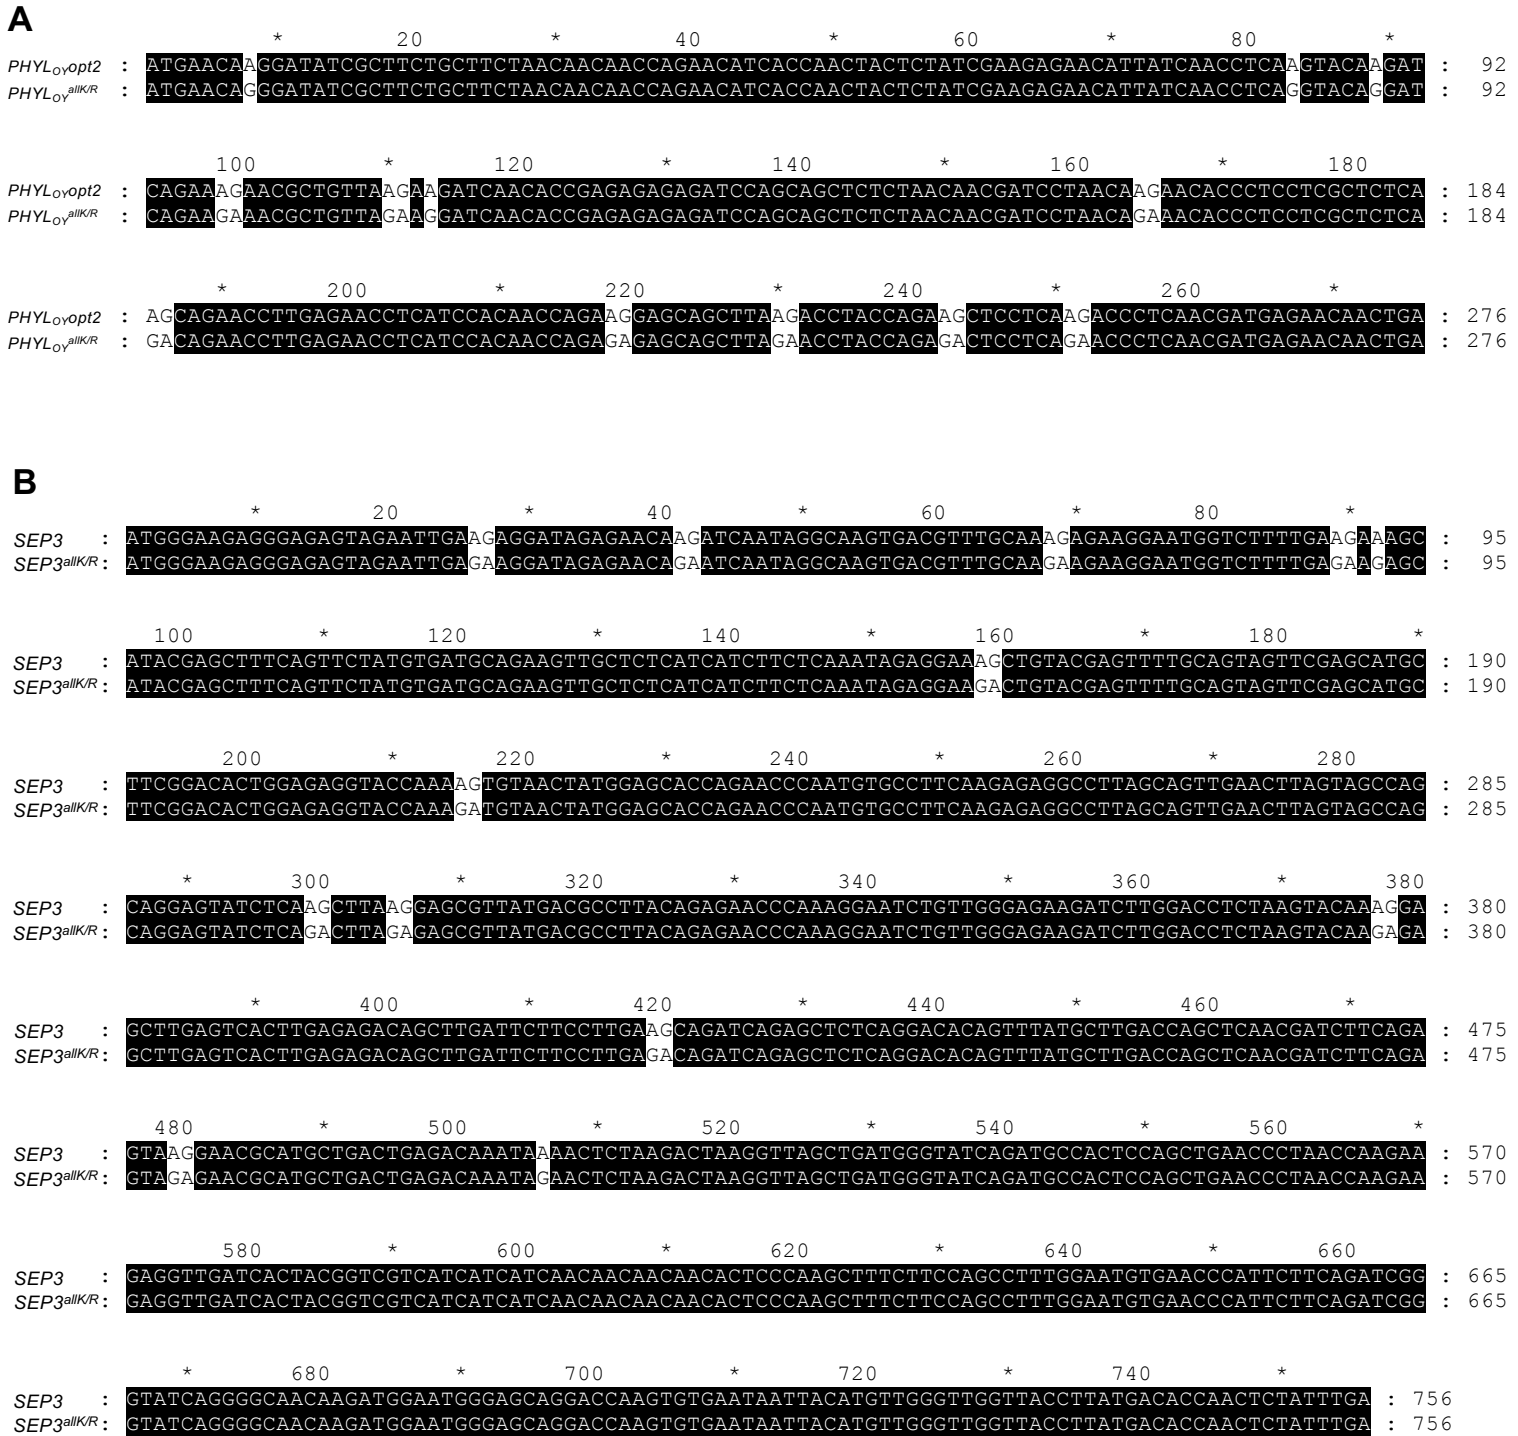

**Supplemental Figure 9.** Modified nucleotide sequences cloned in the study. (Supports Figures 1 to 4.)

Sequences of **(A)** PHYLO<sub>Y</sub><sup>allK/R</sup>, **(B)** SEP3<sup>allK/R</sup>, and **(C)** plant codon-optimized *mScarlet* are shown with the reference sequences (*PHYLO<sub>Y</sub>opt2*, *SEP3*, and *mScarlet*, respectively). Identical nucleotides are indicated by black boxes.

Supplemental Data. Kitazawa et al. (2022). Plant Cell. A phytoplasma effector acts as a ubiquitin-like mediator between floral MADS-box proteins and proteasome shuttle proteins.

**C**

```

mScarlet : ATG* 20 40 60 80 100
              GTGAGCAAGGGCGAGGCAGTGATCAAGGAGTTCATGC*  GGTTC AAGGTGCACATGGAGGGCTC*  CATGAACGGCCACGAGTTCGAGATCGAGGC*  GAGG : 100
optimized : ---GTGAGCAAGGGTGAAGCTGTGATCAAA*  GAATTCATGAG*  GGTTC AAGGTGCACATGGAA*  GGGAG*  CATGAACGGACA*  T*  GAGTTCGAGATCGAAGCT*  GAAG : 97

mScarlet : 120 140 160 180 200
              GCGAGGGCCGCCCTACGAGGGCACCCAGACCGCC*  AAGCTGAAGGTGACCAAG*  GGTGGCCCTTCCCTTCTCTCTGGGACATCCTGTCCCTCAGTTCAT : 200
optimized : GTGAGGGTAGACCTTACGAGGGAACTCAGACTGCT*  AAGCTCAAGGTGACAAAAGGTGGACCCTTCCCTTCTCTTGGGATATCCTTTCACCGCAGTTCAT : 197

mScarlet : 220 240 260 280 300
              GTACGGCTCAGGGCTTT*  CACC*  AAGCACCCCGCCGACATCCCGACTACTATAAGCAGTCC*  TTCCC*  GAGGGCTTCAAGTGGGAGCGCGTGATGAATTC : 300
optimized : GTACGGCTCTAGGGCTTTTACTAAGCACCCCTGCTGATATCCCGACTACTACAAGCAATCTTCCCAGAGGGATTCAAGTGGGAGCGTGTGATGAATTC : 297

mScarlet : 320 340 360 380 400
              GAGGACGGCGGC*  GCGTGTGACCGTGACCCAGGACACTTCCCTGGAGGACGGCACCCCTGATCTACAAGGTGAAGCTCCGCGGCACAACTTCCCTCCTGACG : 400
optimized : GAGGATGGTGGTGTGTGACTGTGACCCAGGATACTTCTCTT*  GAGGATGGGACCCTCATCTACAAGGTGAAGCTCAGGGGAACAACTTCCCTCCTGATG : 397

mScarlet : 420 440 460 480 500
              GCGCCGTAATGCAGAA*  AAGACAATGGGCTGGGAAGCTCC*  ACCGAGCGGT*  TGTAC*  CCCGAGGACGGCGT*  TGCTGAAGGGCGACATTAAGATGGCCCTGCG : 500
optimized : GACCTGTGATGCAGAAA*  AAGACCAATGGGCTGGGAAGCTTCT*  ACCGAGAGACTT*  TAT*  CCTGAGGACGGT*  GTGCTCAAGGGCGATATCAAGATGGCTCTTAG : 497

mScarlet : 520 540 560 580 600
              CCTGAAGGACGGCGGC*  CGCTACCTGGCGGACTTCAAGAC*  CACCTACAAGGCCAAGAA*  CCC*  GTGCAGATGCC*  GCGCGCTACAACGTCGACCGCAAGTTG : 600
optimized : GCTTAAGGACGGTGGACCTTACCTCGCTGATTTCAAGACTACCTACAAGGCCAAGAA*  CCC*  GTGCAGATGCC*  GGGCGCTACAACGTTGACCGTAAGCTC : 597

mScarlet : 620 640 660 680
              GACATCACCTCCACAAACGAGGACTACACCGTGGTGGAA*  CAGTACGAC*  GAT*  CCGAGGGCCCG*  CACTCC*  ACCGGCGGC*  ATGGACGAGCTGTACAAGTGA : 699
optimized : GATATCACCAAGCCACAAACGAGGATTACACTGTGGTGTGAG*  CAGTACGAG*  AT*  CTGAGGGT*  CGT*  CAT*  TCT*  ACCGGT*  GGT*  ATGGACGAGCTGTACAAG--- : 693
    
```

**Supplemental Figure 9, continued.**

**Supplemental Table 1. Primers used in this study.**

| Primer name              | Sequence (5'→3')                                 | Targets                                                   | Purpose                             |
|--------------------------|--------------------------------------------------|-----------------------------------------------------------|-------------------------------------|
| PHYL1_ver2_mnsF          | CCTCAACGATGAGAACAACACTATCTAGACCCAGC              | PHYLO <sub>Y</sub>                                        | deletion of stop codon              |
| PHYL1_ver2_mnsR          | GCTGGGTCTAGATAGTTGTTCTCATCGTTGAGG                | PHYLO <sub>Y</sub>                                        | deletion of stop codon              |
| Phyl1-pColdF             | GGAATTCATATGATGAATAAGGATATTGCTTCTG               | PHYLO <sub>Y</sub>                                        | cloning (pCOLD I)                   |
| Phyl1-pColdR             | CTAGCTAGACTATCAATTATTTTCATCATTAAGAGTC            | PHYLO <sub>Y</sub>                                        | cloning (pCOLD I)                   |
| PHYL1opt2_to_ALSVver2_R  | TCCCCGGGGTGTCTCATCGTTGAGGG                       | PHYLO <sub>Y</sub>                                        | cloning (ALSV vector)               |
| KallR_to_ALSVver2_F      | CCGCTCGAGATGAACAGGGATATCGCTTC                    | PHYLO <sub>Y</sub> <sup>allK.R</sup>                      | cloning (ALSV vector)               |
| Phyl1opt2_ALSVver2_F     | CCGCTCGAGATGAACAAGGATATCGCTTC                    | PHYLO <sub>Y</sub> , PHYLO <sub>Y</sub> <sup>allK.R</sup> | cloning (ALSV vector)               |
| PHYL_to_pENTA_F          | AAGGAACCAATTCAGTCATGAACA                         | PHYLO <sub>Y</sub> , PHYLO <sub>Y</sub> <sup>allK.R</sup> | HA-tag fusion                       |
| PHYL1_G8_HA_R            | TGGGTATCCACCTCCACCTCCACCTCCACCGTTGTTCTCATCGTTGAG | PHYLO <sub>Y</sub> , PHYLO <sub>Y</sub> <sup>allK.R</sup> | HA-tag fusion                       |
| EcoRI_NdeI_PnWB_F        | GGAATTCATATGGATCCTAAGCTCCCTGAG                   | PHYLO <sub>PnWB</sub>                                     | cloning (pCOLD I)                   |
| XhoI_PnWB_R              | CCGCTCGAGTCAGTTCTTCTCATCGTTG                     | PHYLO <sub>PnWB</sub>                                     | cloning (pCOLD I)                   |
| Rad23A_to_pGADT7_F       | ACCAGATTACGCTCATATGAAGCTCACTGTTAAGACTCTCAAGG     | RAD23A                                                    | cloning (pGADT7)                    |
| Rad23A_to_pGADT7_R       | TGCCACCCGGGTGGAATCAGTCTTCAAAATCTGCTG             | RAD23A                                                    | cloning (pGADT7)                    |
| Rad23B_to_pGADT7_F       | ACCAGATTACGCTCATATGAAGCTCACCGTAAAACTCTCAAGG      | RAD23B                                                    | cloning (pGADT7)                    |
| Rad23B_to_pGADT7_R       | TGCCACCCGGGTGGAATCAGTCTTCAAGTCACCTGAG            | RAD23B                                                    | cloning (pGADT7)                    |
| pENTA_Rad23C_mnsF        | GCATGAATTCGAGGAATATCTAGACCCAGCTT                 | RAD23C                                                    | deletion of stop codon              |
| pENTA_Rad23C_mnsR        | AAGCTGGGTCTAGATATTCCTCGAATTCATGC                 | RAD23C                                                    | deletion of stop codon              |
| Rad23C_G8_R              | TCCACCTCCACCTCCACCTCCACCTTCCTCGAATTCATGCATGTGATC | RAD23C                                                    | cloning (pMAL-c5X)                  |
| 23C_to_pMAL_F2           | ATCGAGGGAAGGATTTACATATGAAGATATTTGTGAAAACCTCTCAAG | RAD23C                                                    | cloning (pMAL-c5X)                  |
| Rad23C_to_pGADT7_F       | ACCAGATTACGCTCATATGAAGATATTTGTGAAAACCTCTC        | RAD23C <sub>Ubl</sub>                                     | cloning (pGADT7)                    |
| Ubl_R                    | TGCCACCCGGGTGGAATCATTACTCTTGTTCATCATAATGAC       | RAD23C <sub>Ubl</sub>                                     | cloning (pGADT7)                    |
| UBA1_F                   | ACCAGATTACGCTCATATGCTAGCCGCTGGAAGTAATTTAGAGAG    | RAD23C <sub>UBA1</sub>                                    | cloning (pGADT7)                    |
| UBA1_R                   | TGCCACCCGGGTGGAATCAAGGGATCCCAGTATAAAGATATTC      | RAD23C <sub>UBA1</sub>                                    | cloning (pGADT7)                    |
| Rad4_F                   | ACCAGATTACGCTCATATGCTTACTTCTTGCACAACAGCCAAC      | RAD23C <sub>RAD4</sub>                                    | cloning (pGADT7)                    |
| Rad4_R                   | TGCCACCCGGGTGGAATCCTTCAACGGGTTTATTGATTAAG        | RAD23C <sub>RAD4</sub>                                    | cloning (pGADT7)                    |
| UBA2_F                   | ACCAGATTACGCTCATATGGTACACATGAGGAACGTGAAGCCA      | RAD23C <sub>UBA2</sub>                                    | cloning (pGADT7)                    |
| UBA2_R                   | TGCCACCCGGGTGGAATCAGTGATCTAGAAGATAGTTTGCAGC      | RAD23C <sub>UBA2</sub>                                    | cloning (pGADT7)                    |
| UBA2_to_pENTA_F          | AAGGAACCAATTCAGTCATGGTCAACATGAGGAACGTGA          | RAD23C <sub>UBA2</sub>                                    | cloning (pENTA)                     |
| Rad23D_to_pGADT7_F       | ACCAGATTACGCTCATATGAAGATTTTCGTGAAGACTCTC         | RAD23D                                                    | cloning (pGADT7)                    |
| Rad23D_to_pGADT7_R       | TGCCACCCGGGTGGAATTATTGATCTTCAAACTCATGCATGTG      | RAD23D                                                    | cloning (pGADT7)                    |
| OsRAD23_to_pGADT7_F      | ACCAGATTACGCTCATATGAAGATATCCGTGAAGACTCAAGG       | OsRAD23                                                   | cloning (pGADT7)                    |
| OsRAD23_to_pGADT7_R      | TGCCACCCGGGTGGAATTATGGTGGCCCCCTCGTCGTCGA         | OsRAD23                                                   | cloning (pGADT7)                    |
| OsRAD23_to_pENTA_F       | AAGGAACCAATTCAGTCATGAAGATATCCGTGAAGACTCAAGG      | OsRAD23                                                   | cloning (pENTA)                     |
| OsRAD23_to_pENTA_R       | AAGCTGGGTCTAGATTTATGGTGGCCCCCTCGTCGTCGA          | OsRAD23                                                   | cloning (pENTA)                     |
| OsRAD23_UBA2_to_pGADT7_F | ACCAGATTACGCTCATATGGTTACTCCAGAGGAGAATGAAGC       | OsRAD23 <sub>UBA2</sub>                                   | cloning (pGADT7)                    |
| OsRAD23_UBA2_to_pGADT7_R | TGCCACCCGGGTGGAATCAGTGATCTAGGAGATAGTTTGC         | OsRAD23 <sub>UBA2</sub>                                   | cloning (pGADT7)                    |
| pAD-API-k-F              | GTACCAGATTACGCTCATATGAACTGGTCGATGGAGTATAAC       | API (K domain)                                            | cloning (pGADT7)                    |
| pAD_API_K_R              | ATGCCACCCGGGTGGAATTCTTAGATCTGTTTGAAGAGCAT        | API (K domain)                                            | cloning (pGADT7)                    |
| pENTA-AP3F               | AAGGAACCAATTCAGTCATGGCGAGAGGGAAGATCCAG           | AP3                                                       | cloning (pENTA)                     |
| pENTA-AP3R2              | CTCGAGTGCAGCCGCGAATTTTATTCAAGAAGATGGAAGG         | AP3                                                       | cloning (pENTA)                     |
| pAD-AP3-k-F              | GTACCAGATTACGCTCATATGCGAATGCAAGAAACCAAGAGG       | AP3 (K domain)                                            | cloning (pGADT7)                    |
| pAD_AP3_K_R              | ATGCCACCCGGGTGGAATTCTTACAGCTCATGTATGAG           | AP3 (K domain)                                            | cloning (pGADT7)                    |
| pAD-PI-k-F               | GTACCAGATTACGCTCATATGAACTTAGCAATGAGATTG          | PI (K domain)                                             | cloning (pGADT7)                    |
| pAD_PI_K_R               | ATGCCACCCGGGTGGAATTCTTACAGCTGGAAGTGAAG           | PI (K domain)                                             | cloning (pGADT7)                    |
| pAD_AG_K_F               | GTACCAGATTACGCTCATATGTATTATCAACAAGAATCA          | AG (K domain)                                             | cloning (pGADT7)                    |
| pAD_AG_K_R               | ATGCCACCCGGGTGGAATTCTTATATCTTGCACGAAGAAT         | AG (K domain)                                             | cloning (pGADT7)                    |
| SEP3_inverse_R           | GCTGATGGGTATCAGATGCCA                            | SEP3                                                      | construction of SEP3 <sup>5mt</sup> |

**Supplemental Table 1, continued.**

| Primer name                   | Sequence (5'→3')                                                       | Targets                  | Purpose                             |
|-------------------------------|------------------------------------------------------------------------|--------------------------|-------------------------------------|
| 30aa5mt_to_SEP3_F             | GCAGATCAGAGCTCTCAGGACACAGTTTGCTCTTG                                    | SEP3                     | construction of SEP3 <sup>5mt</sup> |
| 30aa5mt_to_SEP3_R             | TGGCATCTGATACCCATCAGCTAACCTTAGTCTAGCAG                                 | SEP3                     | construction of SEP3 <sup>5mt</sup> |
| SEP3_inverse_for30aacloning_F | CTGTGTCTGAGAGCTCTGATCTGC                                               | SEP3                     | construction of SEP3 <sup>5mt</sup> |
| SEP3_to_pENTA_F               | AAGGAACCAATTCAGTCATGGGAAGAGGGAGAGTAG                                   | SEP3                     | HA- or FLAG-tag fusion              |
| SEP3_G8_R                     | TCCACCTCCACCTCCACCTCCACCAATAGAGTTGGTGTCTATAAGG                         | SEP3                     | HA- or FLAG-tag fusion              |
| SEP3-ADF                      | ACCAGATTACGCTCAAATGGGAAGAGGGAGAGTAGA                                   | SEP3<br>(M domain)       | cloning (pGADT7)                    |
| SEP3-AD177R                   | ATGCCACCCGGGTGGTCAACTGCAAACTCGTACAGCT                                  | SEP3<br>(M domain)       | cloning (pGADT7)                    |
| SEP3-AD178F                   | ACCAGATTACGCTCAAAGTTCGAGCATGCTTCGGAC                                   | SEP3 (I domain)          | cloning (pGADT7)                    |
| SEP3-AD276R                   | ATGCCACCCGGGTGGTCAAAAGTTCAACTGCTAAGGCCT                                | SEP3 (I domain)          | cloning (pGADT7)                    |
| SEP3-AD277F                   | ACCAGATTACGCTCAAAGTAGCCAGCAGGAGTATCT                                   | SEP3<br>(K domain)       | cloning (pGADT7)                    |
| SEP3-AD525R                   | ATGCCACCCGGGTGGTCAATAACCTTAGTCTTAGAGTTTT                               | SEP3<br>(K domain)       | cloning (pGADT7)                    |
| pAD_SEP3_146F                 | GTACCAGATTACGCTCATATGAGGACACAGTTTATGCTT                                | SEP3<br>(K domain)       | cloning (pGADT7)                    |
| pAD_SEP3_145R                 | ATGCCACCCGGGTGGAATTTCTTAGAGAGCTCTGATCTGCTT                             | SEP3<br>(K domain)       | cloning (pGADT7)                    |
| pGEX_SEP3_K_F                 | CGCGGATCCAGTAGCCAGCAGGAGTATC                                           | SEP3<br>(K domain)       | cloning<br>(pGEX-4T-1)              |
| pGEX_SEP3_K_R                 | CCCTCGAGGAATTCTCATAACCTTAGTCTTAGAGTT                                   | SEP3<br>(K domain)       | cloning<br>(pGEX-4T-1)              |
| pAD_SEP3_5mt_F                | GTACCAGATTACGCTCATATGAGGACACAGTTTGCTCTTGAC                             | SEP3 <sup>5mt</sup>      | cloning (pGADT7)                    |
| pAD_SEP3_5mt_R                | ATGCCACCCGGGTGGAATTTATAACCTTAGTCTAGC                                   | SEP3 <sup>5mt</sup>      | cloning (pGADT7)                    |
| SEP3-AD526F                   | ACCAGATTACGCTCAAGCTGATGGGTATCAGATGCC                                   | SEP3<br>(C domain)       | cloning (pGADT7)                    |
| SEP3-ADR                      | ATGCCACCCGGGTGGCTCAAATAGAGTTGGTGTCTAT                                  | SEP3<br>(C domain)       | cloning (pGADT7)                    |
| AtPAD1-F1                     | AAGGAACCAATTCAGTCATGGCGAGATACGATCGAGCAATCACTG                          | PAD1                     | cloning (pENTA)                     |
| AtPAD1-R1                     | AAGCTGGGTCTAGATATGTTTCCTTCGCAGGGCCTTTC                                 | PAD1                     | cloning (pENTA)                     |
| pENTA_to_pGADT7_R             | TGCCACCCGGGTGGAAGTACAAGAAAGCTGGGTCTAGAT                                | genes cloned in<br>pENTA | cloning (pGADT7)                    |
| pENTA_R                       | GACTGAATTGGTTCCTTTAAAGCCTGC                                            | pENTA                    | FLAG- or HA-tag fusion              |
| G8-Flag-pENTA_F               | GGAGGTGGAGGTGGAGGTGGAGACTACAAGGACGACGATGACAA<br>GTGAATCTAGACCCAGCTT    | pENTA                    | FLAG-tag fusion                     |
| G7-HA-pENTA_F                 | GGAGGTGGAGGTGGAGGTGGATACCCATACGATGTTCCAGATTAC<br>GCTTGAATCTAGACCCAGCTT | pENTA                    | HA-tag fusion                       |
| G8_Flag_pMALX_F               | GGAGGTGGAGGTGGAGGTGGAGACTACAAGGACGACGATGACAA<br>GTGATCCGAATTCCTCGCAGG  | pMAL-C5X                 | FLAG-tag fusion                     |
| pMALX_R                       | CATATGTGAAATCCTTCCCTCGA                                                | pMAL-C5X                 | FLAG-tag fusion                     |
| M13R-pCAM2338F                | GTCATAGCTGTTTCTGACTATCAGTGTGTTGACAGGA                                  | pCAMBIA1301              | cloning<br>(ALSV vector)            |
| M13F-pCAM8718                 | ACTGGCCGTCGTTTTACTTCGGCGTTAATTCAGTACA                                  | pCAMBIA1301              | cloning<br>(ALSV vector)            |
